# Supplementary material for: A microfluidic system supports single mouse embryo culture leading to full-term development
Source: Royal Society of Chemistry journal article supplement (doi:10.1039/c3ra44453h), 2013-01-01
Supplement: c3ra44453h.pdf [file c3ra44453h.pdf]

## Supplementary information

### Inertness of PDMS towards mouse embryo development

Naturally fertilized mouse embryos (B6C3F1 $\times$ CD1) are cultured in PDMS microwells (diam. 800  $\mu\text{m}$  ; depth  $\sim$ 200  $\mu\text{m}$ ) throughout their pre-implantation development, from the 1-cell stage to the blastocyst stage (See Figure S1). Medium is not changed during the whole experiment. In this setting, embryos lie on PDMS and above them is medium exposed to air (i.e., open setting). As a control, Nunc 4-well plates (400  $\mu\text{L}$ ) are employed. At the blastocyst stage, the ATP content of the embryos is measured, as an indicator of potential difference in energy metabolism (Table S1), blastocyst rates are determined. These two assays show no impairment of embryo development to the blastocyst stage when utilizing PDMS microwells. Thereafter, birth rates are determined after transplantation of the blastocysts *in vivo*. Again, no difference is observed between PDMS wells and standard dishware, as far as birth rates are concerned.

**Figure S1.** Mouse embryo culture in PDMS microstructures, from 1-cell to blastocyst. A: microwell chip (wells 800  $\mu\text{m}$  diameter, 200  $\mu\text{m}$  height), inserted into a Nunc 4-well plate; arrows indicate blastocysts.

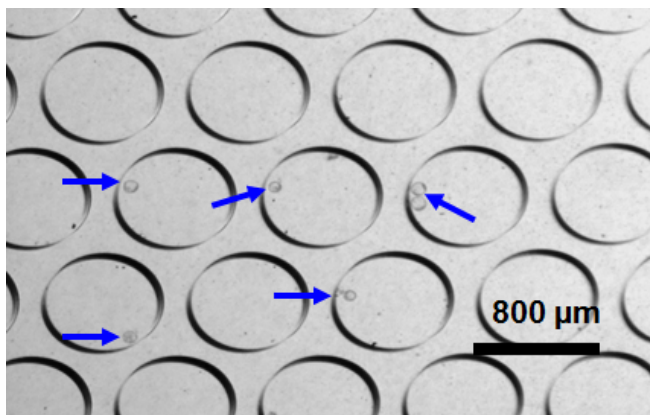

**Table S1:** Developmental and viability data of *in vivo*-fertilized mouse embryos (B6C3F1×CD1) cultured in different plastic dishware.

|                                                          | PDMS microwells in<br>Nunc 12-well (n) | Nunc 4-well<br>(n) | <i>p</i> | Test     |
|----------------------------------------------------------|----------------------------------------|--------------------|----------|----------|
| <b>Blastocyst rate % (1-cell)</b>                        | 79 (43)                                | 71 (65)            | 0.46     | $\chi^2$ |
| <b>ATP pmol/embryo ± SD</b>                              | 1.90 ± 0.63 (30)                       | 1.88 ± 0.15 (40)   | 0.85     | <i>t</i> |
| <b>Embryos transferred <i>in vivo</i> (n recipients)</b> | 64 (4)                                 | 57 (3)             |          |          |
| <b>Pups born n (weight, g ± SD)</b>                      | 24 (1.8 ± 0.2)                         | 18 (2.0 ± 0.3)     | 0.62     | $\chi^2$ |
